# Supplementary material for: Efficient photo-oxidation of bisphenol a and tetracycline through sulfur-doped g-C3N4/CD heterojunctions
Source: Royal Society of Chemistry journal article supplement (doi:10.1039/d4ma00270a), 2024-01-01
Supplement: d4ma00270a1.pdf [file d4ma00270a1.pdf]

## **Efficient Photo-oxidation of Bisphenol A and Tetracycline through Sulfur-Doped g-C<sub>3</sub>N<sub>4</sub>/CD Heterojunctions**

**Ankoo Sura<sup>a</sup>, Amanvir Singh<sup>a</sup>, Arjun Singh<sup>a</sup>, Sudha Narwal<sup>a</sup>, Priya Malik<sup>b</sup>, Manjeet Singh Goyat<sup>c</sup>, Yogendra K. Mishra<sup>d</sup>, Sonia Nain<sup>a,\*</sup>, Surender Duhan<sup>b,\*</sup>**

*<sup>a</sup> Department of Chemistry, Deenbandhu Chhotu Ram University of Science and Technology, Murthal-131039, Haryana, India*

*<sup>b</sup> Advanced Sensors Lab, Department of Physics, Deenbandhu Chhotu Ram University of Science and Technology, Murthal-131039, Haryana, India*

*<sup>c</sup> University of Petroleum and Energy Studies, Physics, Dehradun, Uttarakhand, India*

*<sup>d</sup> Syddansk Universitet-Campus Sonderborg, NanoSYD, Mads Clausen Institute, Sonderborg, Denmark*

## Supplementary Information

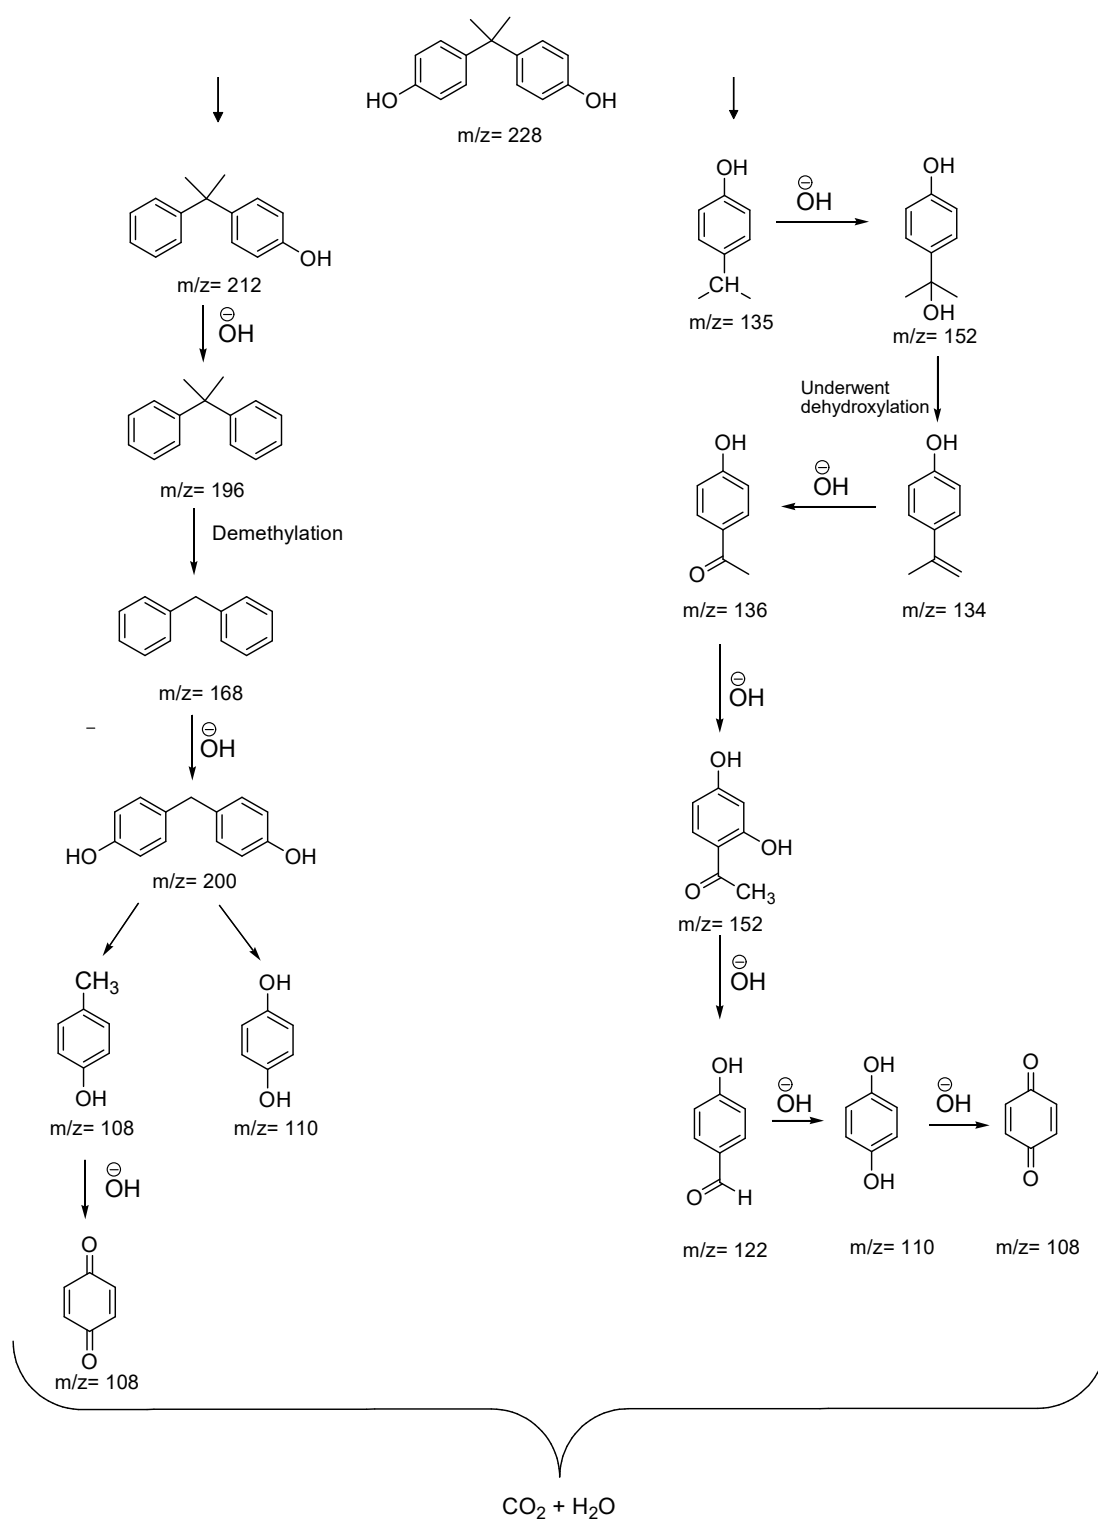

Figure S1: Proposed Pathway for Degradation of BPA

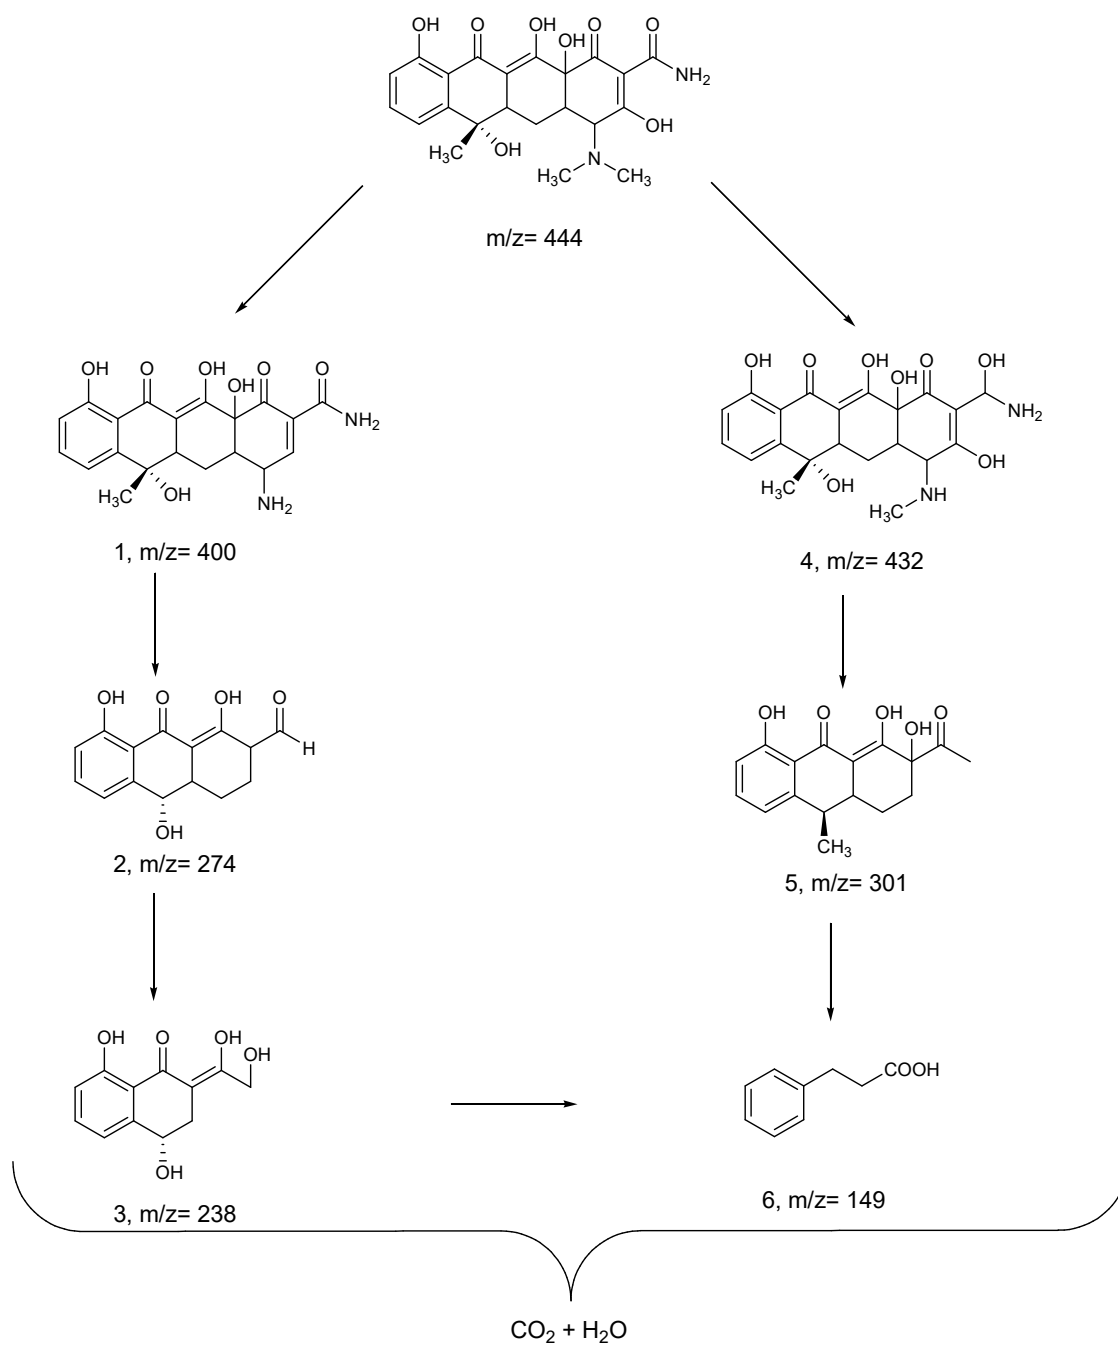

Figure S2: Proposed Pathway for degradation of TC

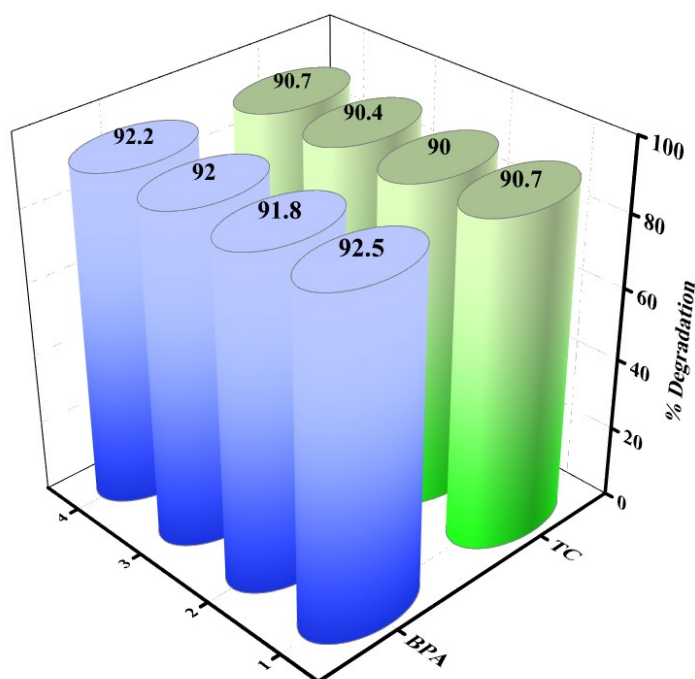

Figure S3: Degradation efficiency of SCN/CD3 after repeated experiments.

| Catalyst | Atomic % |       |       |       |
|----------|----------|-------|-------|-------|
|          | C(1s)    | N(1s) | O(1s) | S(2p) |
| SCN/CD3  | 39.66    | 56.41 | 3.67  | 0.26  |

Figure S4: Atomic % of elements detected by XPS
